# Supplementary material
Source: PubMed Central journal article supplement (PMC390278)
Supplement: nar_32_4_1422__1.pdf [file nar_32_4_1422__1.pdf]

## **Supplementary Materials**

Conformational Change of Pseudouridine 55 Synthase  
upon Its Association with RNA Substrate

Kulwadee Phannachet & Raven H. Huang

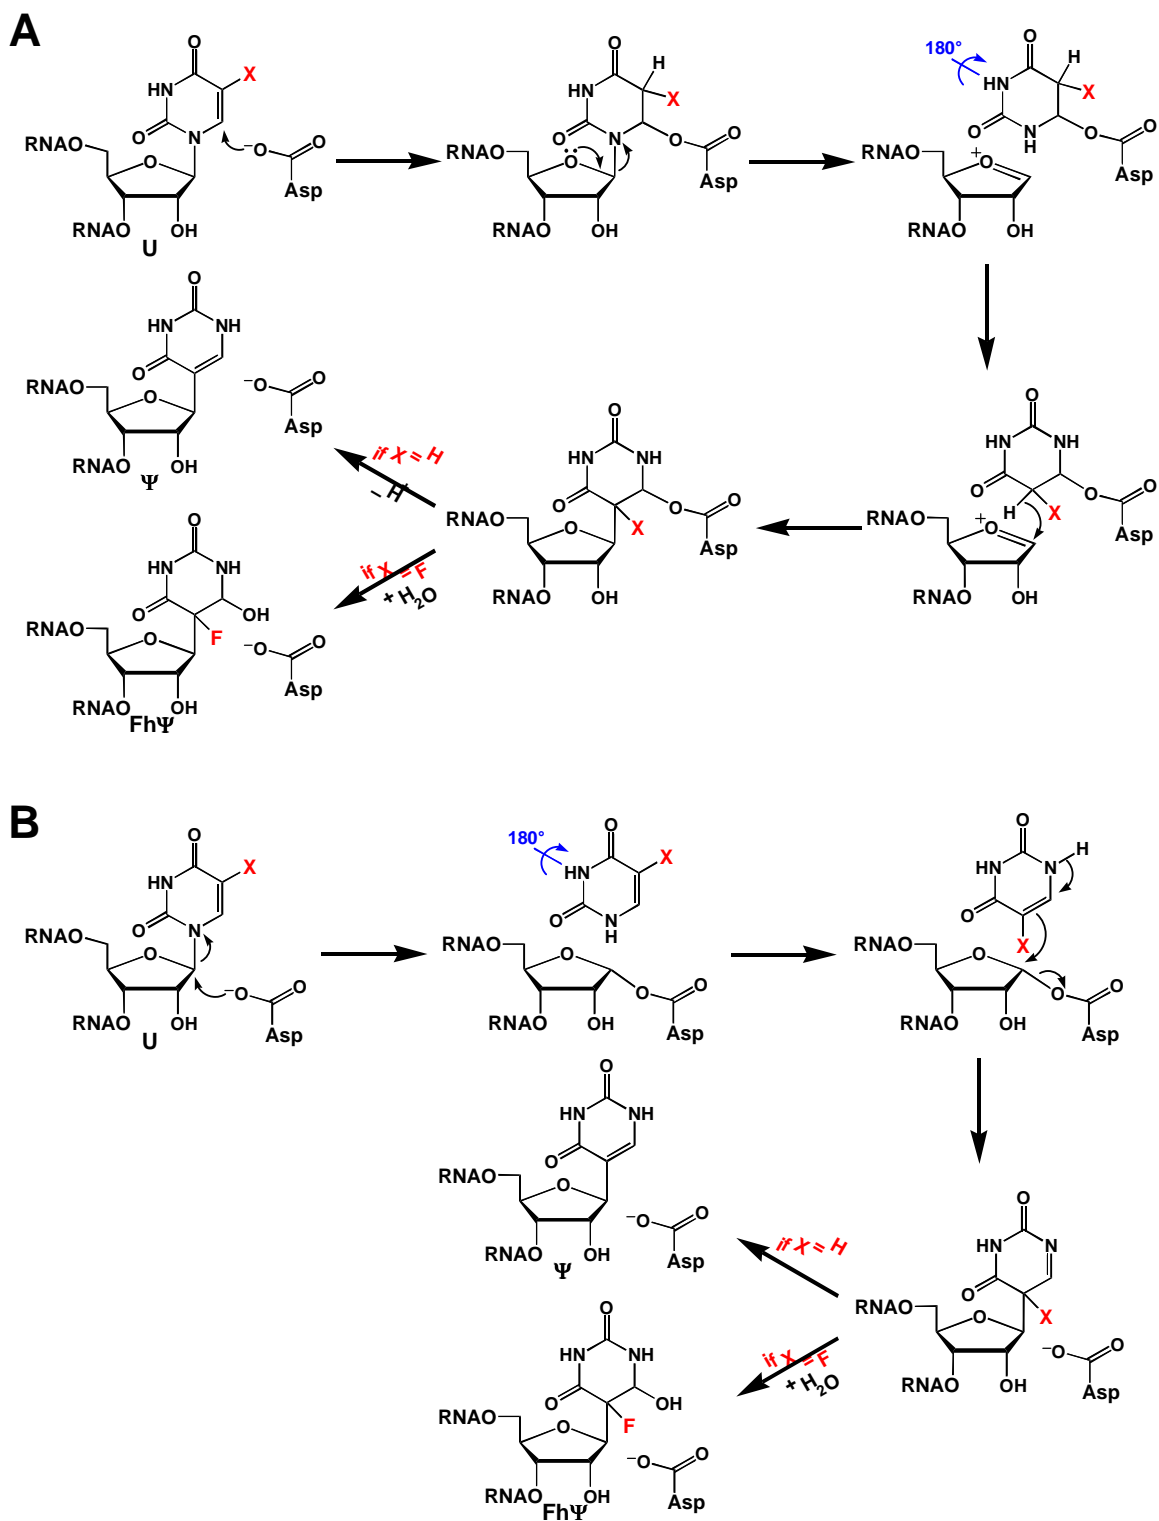

**Figure S1.** Two possible mechanisms of the  $\Psi$ S-catalyzed reactions, modified from Mueller (16). When X=H, RNA is a substrate; when X=F, RNA is an inhibitor. **A.** The first possible mechanism involves nucleophilic attack of the conserved aspartic acid on the C6 of the base to assist the rotation of the base. **B.** The second possible mechanism involves nucleophilic attack of the conserved aspartic acid on the C1' of the ribose to assist the departure of the base.

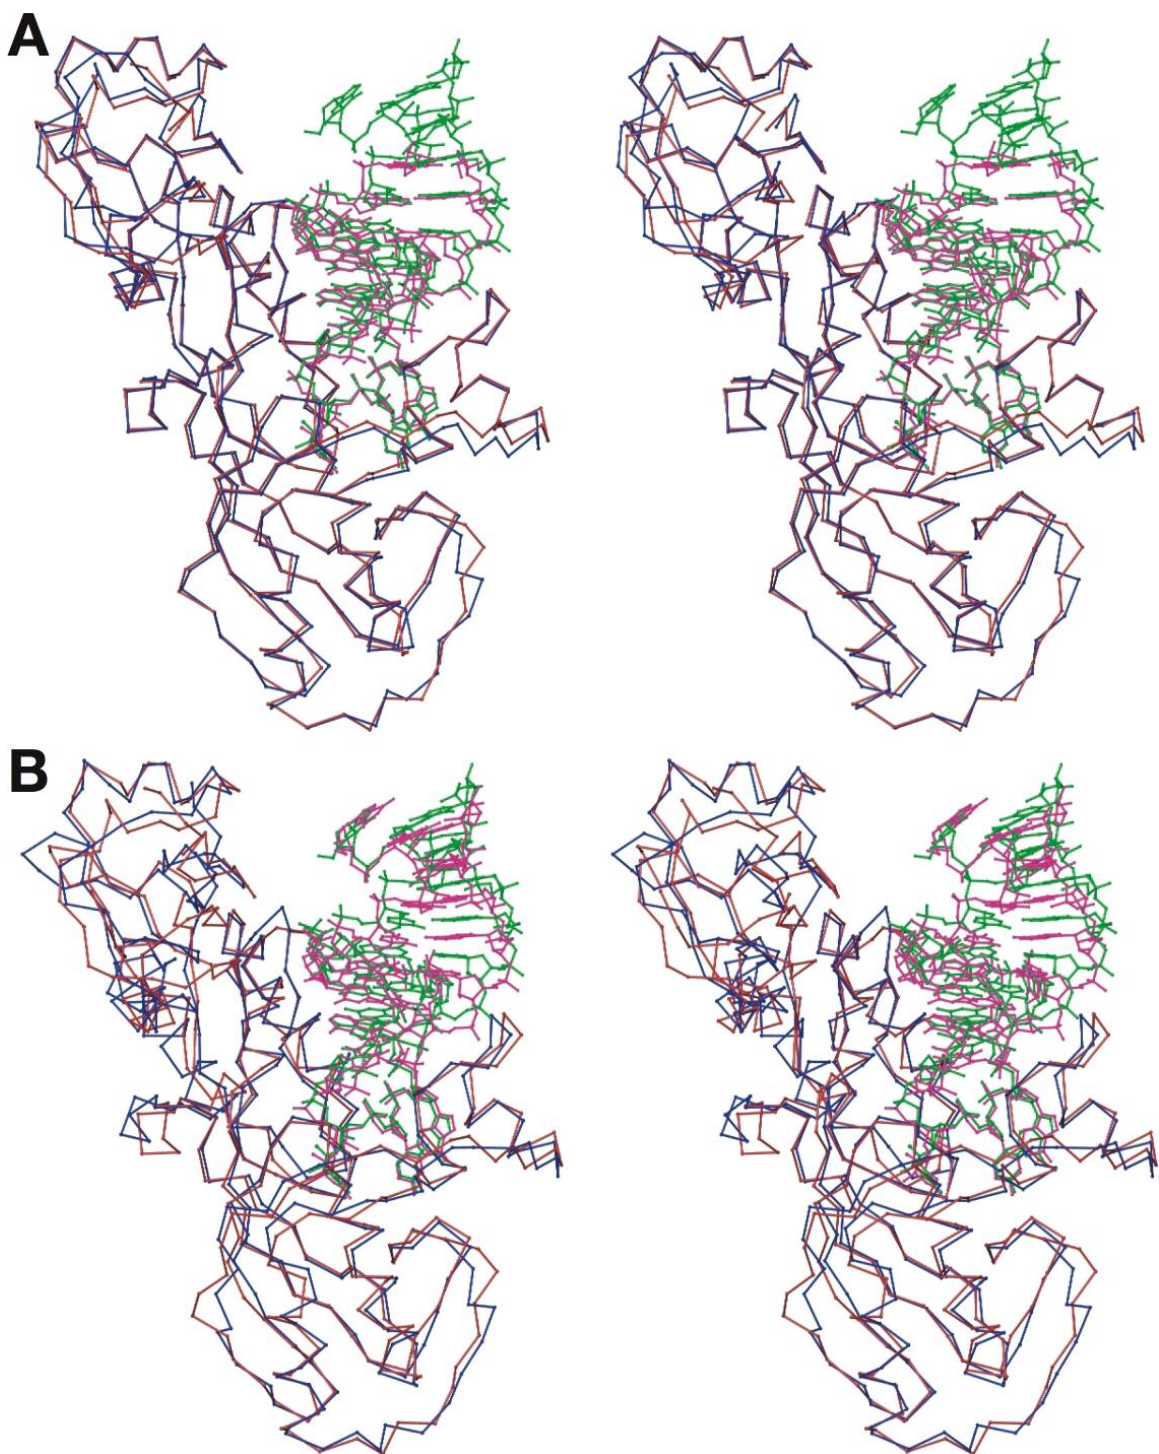

**Figure S2.** Superposition of the structure of  $\Psi$ 55S-RNA complex presented in this paper with the one (PDB ID code: 1R3E) by Stroud and his coworkers (**A**), and the one (PDB ID code: 1R8W) by Hoang and Ferre-D'Amare (**B**). The protein and RNA in our structure are colored red and green, respectively. The protein and RNA from Stroud and his coworkers or from Hoang and Ferre-D'Amare are colored blue and magenta, respectively. The rmsd is 0.8 Å for 1R3E, and 1.8 Å for 1R8W. For comparison, the rmsd between 1R3E and 1R8W is also 1.8 Å.
